# Supplementary material for: Multiscale Regulation of Leaf Traits in Woody Plants as an Adaptation to a Post-Earthquake Environment in Broadleaved Forests of Southwestern China
Source: MDPI journal article supplement (doi:10.3390/f13081323), 2022-08-18
Supplement: s1 [file s1]

## Supplementary Material

**Table S1. Mean monthly averages of climate data for the last 50 years.**

| Climate factors                   | January | February | March | April | May   | June   | July   | August | September | October | November | December |
|-----------------------------------|---------|----------|-------|-------|-------|--------|--------|--------|-----------|---------|----------|----------|
| Mean maximum heat temperature(°C) | 8.60    | 10.4     | 15.00 | 20.95 | 24.60 | 26.70  | 28.65  | 29.20  | 23.95     | 19.55   | 14.75    | 9.90     |
| Mean minimum temperature(°C)      | 2.65    | 4.50     | 8.15  | 12.45 | 16.75 | 19.80  | 21.60  | 21.60  | 17.90     | 13.80   | 8.90     | 3.90     |
| Mean temperature(°C)              | 4.95    | 6.75     | 11.15 | 16.25 | 19.95 | 22.90  | 24.70  | 24.65  | 20.65     | 15.95   | 11.10    | 6.20     |
| Mean precipitation(mm)            | 15.70   | 20.05    | 41.00 | 65.10 | 95.95 | 127.70 | 262.25 | 214.05 | 111.55    | 50.60   | 19.95    | 7.50     |
| Mean precipitation days(mm)       | 10.20   | 11.55    | 14.15 | 15.60 | 16.75 | 17.60  | 18.35  | 17.10  | 20.15     | 18.75   | 11.70    | 8.75     |

**Table S2. Details of sampling sites. (LS: landslide; NLS: not landslide)**

| Sites | E<br>(° ) | N<br>(° ) | Average altitude<br>(m) | Average slope<br>(degree) | Average slope aspect<br>(degree) | Soil type           | Soil thickness<br>(cm) | Litters thickness<br>(cm) |
|-------|-----------|-----------|-------------------------|---------------------------|----------------------------------|---------------------|------------------------|---------------------------|
| LS-1  | 103.5541  | 31.1093   | 1180.09                 | 40.60                     | 104.40                           | Yellow-brown earths | 8.0                    | 2.0                       |
| LS-2  | 103.5572  | 31.1129   | 1206.94                 | 19.67                     | 297.67                           | Yellow-brown earths | 15.0                   | 2.0                       |
| LS-3  | 103.5575  | 31.1177   | 1305.68                 | 19.50                     | 137.50                           | Yellow-brown earths | 7.5                    | 1.5                       |
| LS-4  | 103.5700  | 31.1234   | 1656.57                 | 26.80                     | 275.00                           | Yellow-brown earths | 7.0                    | 1.0                       |
| LS-5  | 103.5764  | 31.1308   | 1768.55                 | 14.00                     | 300.00                           | Yellow-brown earths | 10.0                   | 5.0                       |
| LS-6  | 103.5795  | 31.1545   | 1854.50                 | 31.80                     | 121.60                           | Yellow-brown earths | 15.0                   | 5.0                       |
| LS-7  | 103.5825  | 31.1556   | 1864.78                 | 45.00                     | 310.00                           | Cinnamon soils      | 2.0                    | 0                         |
| LS-8  | 103.5857  | 31.1595   | 1924.50                 | 22.80                     | 263.00                           | Cinnamon soils      | 10.0                   | 3.0                       |
| LS-9  | 103.5871  | 31.1616   | 2000.52                 | 39.60                     | 170.20                           | Cinnamon soils      | 5.0                    | 1.0                       |
| LS-10 | 103.5849  | 31.1607   | 1967.17                 | 25.33                     | 103.67                           | Cinnamon soils      | 10.0                   | 3.0                       |
| LS-11 | 103.5706  | 31.1246   | 1677.17                 | 17.00                     | 305.00                           | Cinnamon soils      | 3.0                    | 1.0                       |
| NLS-1 | 103.5629  | 31.1225   | 1588.91                 | 13.50                     | 80.33                            | Yellow-brown earths | 24.0                   | 7.0                       |
| NLS-2 | 103.5683  | 31.1227   | 1645.05                 | 20.60                     | 288.50                           | Yellow-brown earths | 23.5                   | 5.0                       |
| NLS-3 | 103.5736  | 31.1292   | 1802.08                 | 11.00                     | 117.50                           | Yellow-brown earths | 21.0                   | 6.0                       |
| NLS-4 | 103.5770  | 31.1379   | 1832.37                 | 27.50                     | 100.50                           | Yellow-brown earths | 18.5                   | 5.5                       |
| NLS-5 | 103.3795  | 31.1462   | 1829.35                 | 32.33                     | 253.00                           | Cinnamon soils      | 33.0                   | 6.0                       |

**Table S3 Abbreviations of this study.**

| Subject                             | Abbreviations | Units                             | Meanings                       |
|-------------------------------------|---------------|-----------------------------------|--------------------------------|
| Founctional traits                  | SLA           | $\text{cm}^2 \cdot \text{g}^{-1}$ | Specific leaf area             |
|                                     | LDMC          | $\text{mg} \cdot \text{g}^{-1}$   | Leaf dry matter content        |
|                                     | SDY           | $\text{g} \cdot \text{cm}^{-3}$   | Stem density                   |
|                                     | LT            | mm                                | Leaf thickness                 |
|                                     | APH           | cm                                | Average plant height           |
|                                     | CD            | cm                                | Crown diameter                 |
|                                     | TKW           | g                                 | Thousand kernel weight         |
| Ecological scales                   | WFT           | -                                 | Woody plant functional types   |
|                                     | LoN           | -                                 | Landslides or not              |
|                                     | Sit           | -                                 | Sample sites                   |
|                                     | SPP           | -                                 | Species                        |
| Enviromentall factors of landslides | ATT           | m                                 | Altitude                       |
|                                     | SLO           | degree                            | Slope                          |
|                                     | ASP           | -                                 | Transformation of slope aspect |
|                                     | LIT           | cm                                | Average litter thinkness       |
|                                     | S-w           | m                                 | Width of landslide mass        |
|                                     | SOC           | g/kg                              | Soil organic carbon            |
|                                     | STN           | g/kg                              | Soil total nitrogen            |
|                                     | S-ty          | -                                 | Soil type                      |
|                                     | S-th          | cm                                | Soil thickness                 |
|                                     | SP-Q          | -                                 | Species quantity               |
|                                     | Co-H          | %                                 | Herb coverage                  |

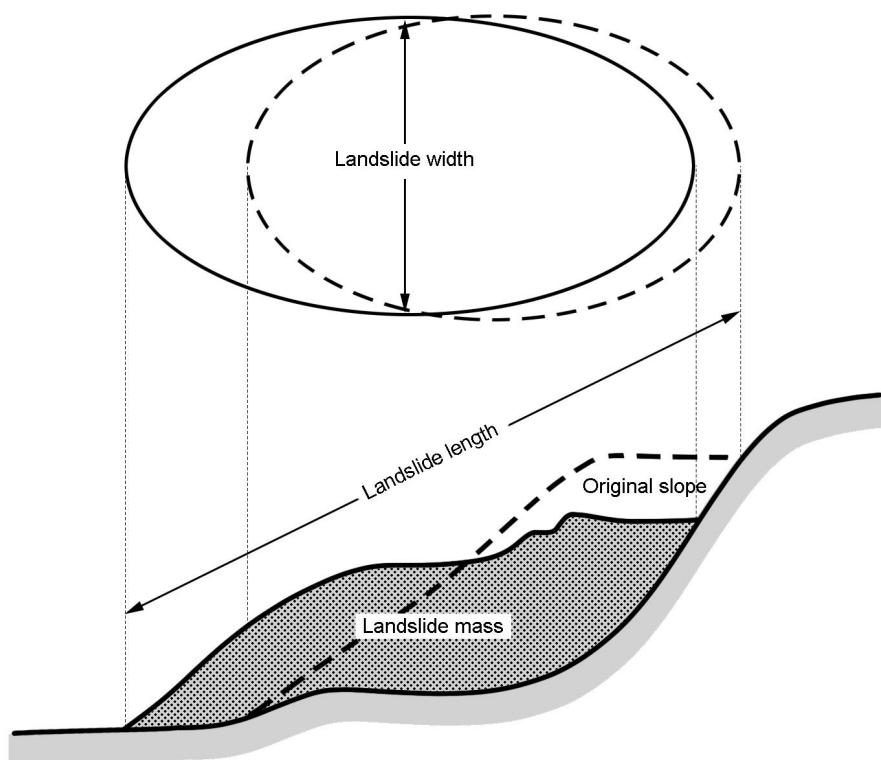

**Figure S1. Schematic diagram of landslide mass structure.**

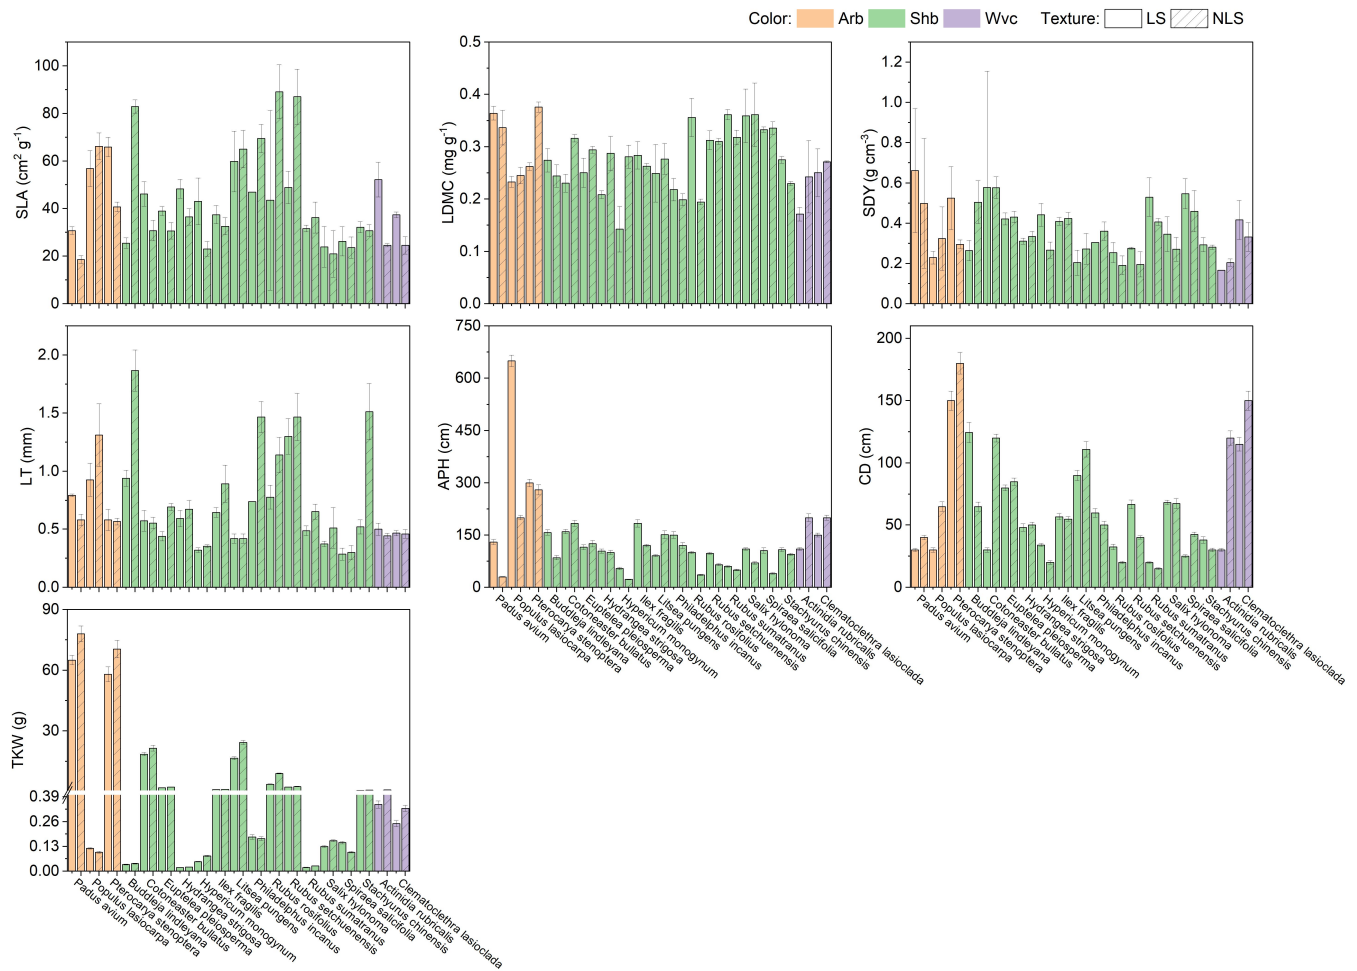

**Figure S2. Functional traits of share species in both landslide and not-landslide area.**

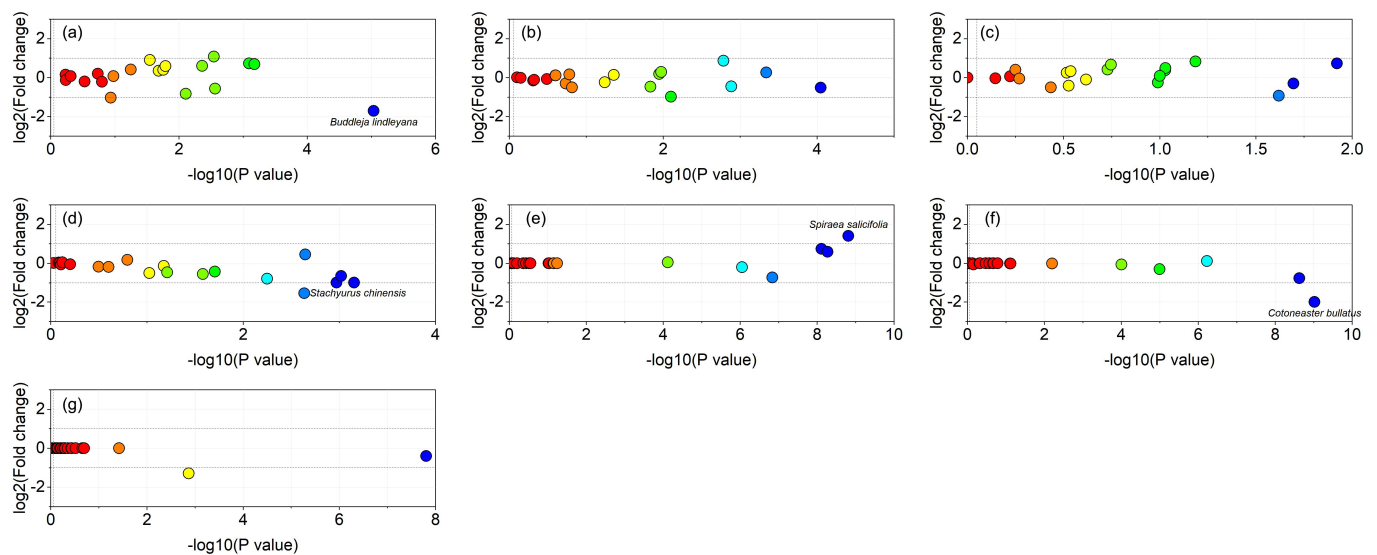

**Figure S3. Key species of difference in functional traits between landslide and not-landslide.**

**Table S4. One-way variance analysis of woody plant functional traits between WFTs on landslide and not-landslide.** SLA, specific leaf area; LDMC, leaf dry matter content; ; SDY, stem density; LT, leaf thickness; APH, average plant height; CD, crown diameter; TKW, thousand kernel weight.

| Type          | Functional traits | Arbor                 | Shrubs and small arbor | Woody vines and climbing shrubs |
|---------------|-------------------|-----------------------|------------------------|---------------------------------|
| Landslide     | <b>SLA</b>        | <b>43.81(±15.58)a</b> | <b>37.27(±13.57)ab</b> | <b>31.07(±15.64)b</b>           |
|               | LDMC              | 0.32(±0.09)a          | 0.28(±0.06)a           | 0.28(±0.09)a                    |
|               | SDY               | 0.36(±0.15)a          | 0.33(±0.18)a           | 0.28(±0.11)a                    |
|               | LT                | 0.65(±0.21)a          | 0.53(±0.26)a           | 0.48(±0.15)a                    |
|               | <b>APH</b>        | <b>152.5(±99.46)a</b> | <b>112.06(±39.49)b</b> | <b>117.5(±65.19)ab</b>          |
|               | CD                | 60(±54.27)a           | 57.98(±27.97)a         | 65.15(±31.81)a                  |
|               | <b>TKW</b>        | <b>37.36(±38.63)a</b> | <b>3.22(±7.32)b</b>    | <b>2.24(±2.33)b</b>             |
|               | SLA               | 41.82(±20.85)a        | 47.18(±28)a            | 45.68(±37.18)a                  |
| Not-landslide | LDMC              | 0.32(±0.06)a          | 0.28(±0.06)a           | 0.29(±0.06)a                    |
|               | <b>SDY</b>        | <b>0.37(±0.2)a</b>    | <b>0.35(±0.13)ab</b>   | <b>0.25(±0.07)b</b>             |
|               | LT                | 0.82(±0.39)a          | 1.01(±0.64)a           | 0.58(±0.23)a                    |
|               | <b>APH</b>        | <b>165(±94.72)a</b>   | <b>102.23(±48.59)b</b> | <b>81.98(±58.25)b</b>           |
|               | CD                | 60(±54.27)a           | 60.01(±29.66)a         | 49.9(±28.15)a                   |
|               | <b>TKW</b>        | <b>40.38(±35.8)a</b>  | <b>4.88(±8.21)b</b>    | <b>11.39(±15.5)b</b>            |
|               |                   |                       |                        |                                 |
